# Supplementary material for: Usefulness of Matrix Metalloproteinase-7 in Saliva as a Diagnostic Biomarker for Laryngopharyngeal Reflux Disease.
Source: Research Square preprint supplement (doi:10.21203/rs.3.rs-490220/v1), 2021-05-07

# **Usefulness of Matrix Metalloproteinase-7 in saliva as a diagnostic biomarker for laryngopharyngeal reflux disease.**

**Nu-Ri Im<sup>1</sup>, Byoungjae Kim<sup>1,2</sup>, Kwang-Yoon Jung<sup>1</sup>, Seung-Kuk Baek<sup>1</sup>.**

<sup>1</sup>Department of Otorhinolaryngology-Head and Neck Surgery, Korea University, College of Medicine, Seoul, South Korea;

<sup>2</sup>Neuroscience research institute, Korea University, College of Medicine, Seoul, Republic of Korea

**Supplementary Figure 1. Soluble E-cadherin protein level, MMP-7 protein level, and MMP-7 enzyme activity within saliva samples over time.** (A) Schematic diagram of the saliva sampling timeline (B) Expressions of soluble E-cadherin and MMP-7 protein according to sampling time in control and study groups. (C) MMP-7 enzyme activity according to sampling time in control and study groups. Sampling time is indicated by numbers (1 to 8).

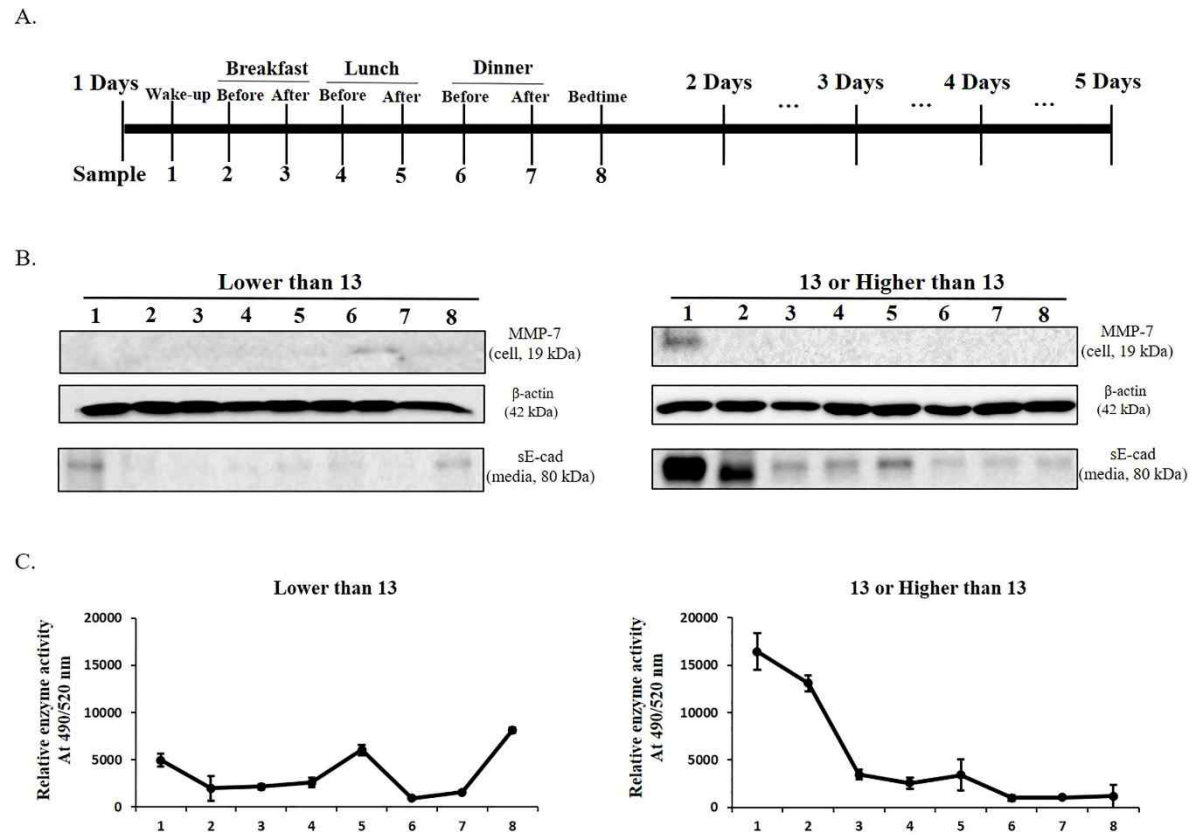

**Supplementary Figure 2. Expression change of soluble E-cadherin and MMP-7 in saliva  
(Full-length blots/gels of Supplementary Figure 1)**

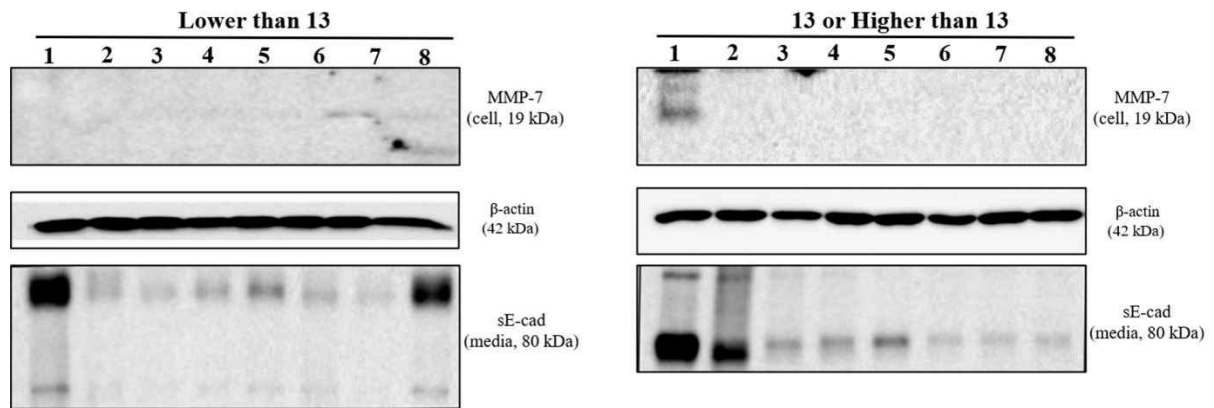

Supplement: Supplementary file 1 [file 301d25de8eb62a188b48dfec.pdf]
